# Supplementary material for: Experimental charge density of octafluoro-1,2-dimethylenecyclobutane: atomic volumes and charges in a perfluorinated hydrocarbonElectronic supplementary information (ESI) available: Crystallographic data (single crystal data) in cif format (CCDC reference number 195109), multipole population coefficients and a modified version of Table 2 containing in addition bond energies T, V and H. See http://www.rsc.org/suppdata/ob/b2/b208704a/
Source: Royal Society of Chemistry journal article supplement (doi:10.1039/b208704a), 2002-12-17
Supplement: tables1.pdf [file tables1.pdf]

## **Deposition Material**

- 1) Table 2, extended by the quantities T, V and H**
- 2) Multipole population coefficients**

The characteristics at the (3,-1) bond critical points and at the (3,+1) ring critical points. 1. line: experimental, 2. line: from B3LYP calculation.

| bond                  | lengths<br>[Å] | d <sub>1</sub><br>[Å] <sup>*)</sup> | ρ( <b>r</b> )<br>[e/Å <sup>3</sup> ] | -∇ <sup>2</sup> ρ( <b>r</b> )<br>[e/Å <sup>5</sup> ] | T<br>[a.u.] | V<br>[a.u.] | H<br>[a.u.] | ε    |
|-----------------------|----------------|-------------------------------------|--------------------------------------|------------------------------------------------------|-------------|-------------|-------------|------|
| C(1)–F(1)             | 1.306(1)       | 0.478                               | 2.22(4)                              | -27.6(3)                                             | 0.259       | -0.805      | -0.546      | 0.40 |
| B3LYP                 | 1.312          | 0.440                               | 2.01                                 | -2.7                                                 | 0.363       | -0.753      | -0.391      | 0.17 |
| C(1)–F(2)             | 1.310(1)       | 0.484                               | 2.21(5)                              | -27.3(3)                                             | 0.258       | -0.799      | -0.541      | 0.40 |
| B3LYP                 | 1.311          | 0.440                               | 2.01                                 | -2.8                                                 | 0.362       | -0.753      | -0.391      | 0.17 |
| C(6)–F(7)             | 1.310(1)       | 0.484                               | 2.21(5)                              | -27.3(3)                                             | 0.258       | -0.799      | -0.541      | 0.40 |
| B3LYP                 | 1.311          | 0.440                               | 2.01                                 | -2.8                                                 | 0.362       | -0.753      | -0.391      | 0.17 |
| C(6)–F(8)             | 1.304(1)       | 0.476                               | 2.23(4)                              | -27.6(3)                                             | 0.263       | -0.816      | -0.549      | 0.40 |
| B3LYP                 | 1.312          | 0.440                               | 2.01                                 | -2.7                                                 | 0.363       | -0.753      | -0.391      | 0.17 |
| C(3)–F(3)             | 1.347(1)       | 0.546                               | 2.11(5)                              | -20.9(2)                                             | 0.269       | -0.755      | -0.486      | 0.09 |
| B3LYP                 | 1.347          | 0.457                               | 1.87                                 | -7.1                                                 | 0.289       | -0.652      | -0.363      | 0.15 |
| C(3)–F(4)             | 1.344(1)       | 0.543                               | 2.11(4)                              | -21.2(2)                                             | 0.267       | -0.754      | -0.487      | 0.06 |
| B3LYP                 | 1.347          | 0.457                               | 1.87                                 | -7.1                                                 | 0.289       | -0.652      | -0.363      | 0.15 |
| C(4)–F(5)             | 1.345(1)       | 0.544                               | 2.11(4)                              | -21.1(2)                                             | 0.268       | -0.754      | -0.487      | 0.09 |
| B3LYP                 | 1.347          | 0.457                               | 1.87                                 | -7.1                                                 | 0.289       | -0.652      | -0.363      | 0.15 |
| C(4)–F(6)             | 1.345(1)       | 0.543                               | 2.11(5)                              | -21.0(2)                                             | 0.268       | -0.755      | -0.486      | 0.06 |
| B3LYP                 | 1.347          | 0.457                               | 1.87                                 | -7.1                                                 | 0.289       | -0.652      | -0.363      | 0.15 |
| C(1)–C(2)             | 1.325(1)       | 0.738                               | 2.40(4)                              | -26.7(2)                                             | 0.328       | -0.933      | -0.605      | 0.51 |
| B3LYP                 | 1.326          | 0.734                               | 2.39                                 | -26.9                                                | 0.323       | -0.925      | -0.602      | 0.51 |
| C(5)–C(6)             | 1.323(1)       | 0.586                               | 2.41(4)                              | -27.0(2)                                             | 0.329       | -0.939      | -0.610      | 0.51 |
| B3LYP                 | 1.326          | 0.592                               | 2.39                                 | -26.9                                                | 0.323       | -0.925      | -0.602      | 0.51 |
| C(2)–C(5)             | 1.458(1)       | 0.730                               | 1.85(2)                              | -15.79(9)                                            | 0.223       | -0.610      | -0.387      | 0.34 |
| B3LYP                 | 1.461          | 0.731                               | 1.83                                 | -16.4                                                | 0.213       | -0.596      | -0.383      | 0.14 |
| C(2)–C(3)             | 1.509(1)       | 0.741                               | 1.63(3)                              | -13.8(1)                                             | 0.175       | -0.490      | -0.317      | 0.24 |
| B3LYP                 | 1.515          | 0.746                               | 1.76                                 | -15.4                                                | 0.199       | -0.558      | -0.359      | 0.03 |
| C(4)–C(5)             | 1.508(1)       | 0.771                               | 1.64(3)                              | -13.9(1)                                             | 0.176       | -0.495      | -0.320      | 0.24 |
| B3LYP                 | 1.515          | 0.771                               | 1.76                                 | -15.4                                                | 0.199       | -0.558      | -0.359      | 0.03 |
| C(3)–C(4)             | 1.574(1)       | 0.788                               | 1.65(2)                              | -13.06(7)                                            | 0.185       | -0.504      | -0.319      | 0.13 |
| B3LYP                 | 1.580          | 0.791                               | 1.66                                 | -13.8                                                | 0.182       | -0.507      | -0.325      | 0.05 |
| ring 1 <sup>xx)</sup> |                |                                     | 0.41(1)                              | 10.8(3)                                              |             |             |             |      |
| B3LYP                 |                |                                     | 0.59                                 | 9.4                                                  |             |             |             |      |
| ring 2 <sup>xx)</sup> |                |                                     | 0.02(1)                              | 0.40(1)                                              |             |             |             |      |
| B3LYP                 |                |                                     | 0.03                                 | 0.6                                                  |             |             |             |      |

\*) d<sub>1</sub> is the distance from the bcp to the first atom given in the first column.

<sup>xx)</sup> ring 1 is the cyclobutane ring, ring 2 is the non closed ring region F(1)-C(1)-C(2)-C(5)-C(6)-F(8).
