# Supplementary material for: Experimental charge density of octafluoro-1,2-dimethylenecyclobutane: atomic volumes and charges in a perfluorinated hydrocarbonElectronic supplementary information (ESI) available: Crystallographic data (single crystal data) in cif format (CCDC reference number 195109), multipole population coefficients and a modified version of Table 2 containing in addition bond energies T, V and H. See http://www.rsc.org/suppdata/ob/b2/b208704a/
Source: Royal Society of Chemistry journal article supplement (doi:10.1039/b208704a), 2002-12-17
Supplement: tables2.pdf [file tables2.pdf]

## Multipole population coefficients

| atom | $P_v$    | $P_{00}$ | $P_{11}$ | $P_{1-1}$ | $P_{10}$  |
|------|----------|----------|----------|-----------|-----------|
| F(4) | 7.35( 2) | 0.00( 0) | 0.00( 0) | 0.00( 0)  | 0.01( 1)  |
| F(3) | 7.35( 0) | 0.00( 0) | 0.00( 0) | 0.00( 0)  | 0.01( 0)  |
| F(6) | 7.35( 0) | 0.00( 0) | 0.00( 0) | 0.00( 0)  | 0.01( 0)  |
| F(1) | 7.25( 3) | 0.00( 0) | 0.00( 0) | 0.00( 0)  | 0.04( 2)  |
| F(5) | 7.35( 0) | 0.00( 0) | 0.00( 0) | 0.00( 0)  | 0.01( 0)  |
| F(2) | 7.25( 3) | 0.00( 0) | 0.00( 0) | 0.00( 0)  | 0.04( 2)  |
| F(8) | 7.25( 0) | 0.00( 0) | 0.00( 0) | 0.00( 0)  | 0.04( 0)  |
| F(7) | 7.25( 0) | 0.00( 0) | 0.00( 0) | 0.00( 0)  | 0.04( 0)  |
| C(2) | 3.70( 6) | 0.00( 0) | 0.04( 2) | 0.04( 2)  | 0.01( 0)  |
| C(5) | 3.70( 0) | 0.00( 0) | 0.04( 0) | 0.04( 0)  | 0.01( 0)  |
| C(3) | 3.35( 5) | 0.00( 0) | 0.12( 2) | 0.06( 2)  | -0.01( 0) |
| C(4) | 3.35( 0) | 0.00( 0) | 0.12( 0) | 0.06( 0)  | -0.01( 0) |
| C(1) | 3.74( 8) | 0.00( 0) | 0.00( 2) | 0.00( 2)  | 0.13( 0)  |
| C(6) | 3.74( 0) | 0.00( 0) | 0.00( 0) | 0.00( 0)  | 0.13( 0)  |

| atom | $P_{20}$  | $P_{21}$ | $P_{2-1}$ | $P_{22}$  | $P_{2-2}$ |
|------|-----------|----------|-----------|-----------|-----------|
| F(4) | -0.05( 2) | 0.00( 0) | 0.00( 0)  | 0.00( 0)  | 0.00( 0)  |
| F(3) | -0.05( 0) | 0.00( 0) | 0.00( 0)  | 0.00( 0)  | 0.00( 0)  |
| F(6) | -0.05( 0) | 0.00( 0) | 0.00( 0)  | 0.00( 0)  | 0.00( 0)  |
| F(1) | -0.11( 3) | 0.00( 0) | 0.00( 0)  | 0.00( 0)  | 0.00( 0)  |
| F(5) | -0.05( 0) | 0.00( 0) | 0.00( 0)  | 0.00( 0)  | 0.00( 0)  |
| F(2) | -0.11( 3) | 0.00( 0) | 0.00( 0)  | 0.00( 0)  | 0.00( 0)  |
| F(8) | -0.11( 0) | 0.00( 0) | 0.00( 0)  | 0.00( 0)  | 0.00( 0)  |
| F(7) | -0.11( 0) | 0.00( 0) | 0.00( 0)  | 0.00( 0)  | 0.00( 0)  |
| C(2) | 0.01( 2)  | 0.00( 0) | 0.03( 0)  | -0.07( 2) | 0.10( 2)  |
| C(5) | 0.01( 0)  | 0.00( 0) | 0.03( 0)  | -0.07( 0) | 0.10( 0)  |
| C(3) | 0.05( 2)  | 0.01( 0) | -0.01( 0) | 0.02( 1)  | 0.06( 2)  |
| C(4) | 0.05( 0)  | 0.01( 0) | -0.01( 0) | 0.02( 0)  | 0.06( 0)  |
| C(1) | 0.19( 2)  | 0.00( 0) | 0.00( 0)  | 0.02( 2)  | 0.00( 2)  |
| C(6) | 0.19( 0)  | 0.00( 0) | 0.00( 0)  | 0.02( 0)  | 0.00( 0)  |

| atom | $P_{30}$  | $P_{31}$  | $P_{3-1}$ | $P_{32}$  | $P_{3-2}$ | $P_{33}$ | $P_{3-3}$ |
|------|-----------|-----------|-----------|-----------|-----------|----------|-----------|
| F(4) | -0.01( 1) | 0.00( 0)  | 0.00( 0)  | 0.00( 0)  | 0.00( 0)  | 0.00( 0) | 0.00( 0)  |
| F(3) | -0.01( 0) | 0.00( 0)  | 0.00( 0)  | 0.00( 0)  | 0.00( 0)  | 0.00( 0) | 0.00( 0)  |
| F(6) | -0.01( 0) | 0.00( 0)  | 0.00( 0)  | 0.00( 0)  | 0.00( 0)  | 0.00( 0) | 0.00( 0)  |
| F(1) | 0.03( 2)  | 0.00( 0)  | 0.00( 0)  | 0.00( 0)  | 0.00( 0)  | 0.00( 0) | 0.00( 0)  |
| F(5) | -0.01( 0) | 0.00( 0)  | 0.00( 0)  | 0.00( 0)  | 0.00( 0)  | 0.00( 0) | 0.00( 0)  |
| F(2) | 0.03( 2)  | 0.00( 0)  | 0.00( 0)  | 0.00( 0)  | 0.00( 0)  | 0.00( 0) | 0.00( 0)  |
| F(8) | 0.03( 0)  | 0.00( 0)  | 0.00( 0)  | 0.00( 0)  | 0.00( 0)  | 0.00( 0) | 0.00( 0)  |
| F(7) | 0.03( 0)  | 0.00( 0)  | 0.00( 0)  | 0.00( 0)  | 0.00( 0)  | 0.00( 0) | 0.00( 0)  |
| C(2) | -0.03( 0) | -0.04( 2) | -0.03( 2) | -0.01( 0) | -0.01( 0) | 0.21( 2) | -0.16( 2) |
| C(5) | -0.03( 0) | -0.04( 0) | -0.03( 0) | -0.01( 0) | -0.01( 0) | 0.21( 0) | -0.16( 0) |
| C(3) | -0.02( 0) | -0.22( 2) | -0.23( 2) | 0.02( 0)  | 0.03( 0)  | 0.18( 2) | -0.19( 2) |
| C(4) | -0.02( 0) | -0.22( 0) | -0.23( 0) | 0.02( 0)  | 0.03( 0)  | 0.18( 0) | -0.19( 0) |
| C(1) | 0.29( 0)  | 0.00( 2)  | 0.00( 2)  | 0.33( 0)  | 0.00( 0)  | 0.00( 3) | 0.00( 2)  |
| C(6) | 0.29( 0)  | 0.00( 0)  | 0.00( 0)  | 0.33( 0)  | 0.00( 0)  | 0.00( 0) | 0.00( 0)  |

| atom | $P_{40}$  | $P_{41}$ | $P_{4-1}$ | $P_{42}$  | $P_{4-2}$ | $P_{43}$ | $P_{4-3}$ | $P_{44}$  | $P_{4-4}$ |
|------|-----------|----------|-----------|-----------|-----------|----------|-----------|-----------|-----------|
| F(4) | 0.00( 2)  | 0.00( 0) | 0.00( 0)  | 0.00( 0)  | 0.00( 0)  | 0.00( 0) | 0.00( 0)  | 0.00( 0)  | 0.00( 0)  |
| F(3) | 0.00( 0)  | 0.00( 0) | 0.00( 0)  | 0.00( 0)  | 0.00( 0)  | 0.00( 0) | 0.00( 0)  | 0.00( 0)  | 0.00( 0)  |
| F(6) | 0.00( 0)  | 0.00( 0) | 0.00( 0)  | 0.00( 0)  | 0.00( 0)  | 0.00( 0) | 0.00( 0)  | 0.00( 0)  | 0.00( 0)  |
| F(1) | 0.02( 2)  | 0.00( 0) | 0.00( 0)  | 0.00( 0)  | 0.00( 0)  | 0.00( 0) | 0.00( 0)  | 0.00( 0)  | 0.00( 0)  |
| F(5) | 0.00( 0)  | 0.00( 0) | 0.00( 0)  | 0.00( 0)  | 0.00( 0)  | 0.00( 0) | 0.00( 0)  | 0.00( 0)  | 0.00( 0)  |
| F(2) | 0.02( 2)  | 0.00( 0) | 0.00( 0)  | 0.00( 0)  | 0.00( 0)  | 0.00( 0) | 0.00( 0)  | 0.00( 0)  | 0.00( 0)  |
| F(8) | 0.02( 0)  | 0.00( 0) | 0.00( 0)  | 0.00( 0)  | 0.00( 0)  | 0.00( 0) | 0.00( 0)  | 0.00( 0)  | 0.00( 0)  |
| F(7) | 0.02( 0)  | 0.00( 0) | 0.00( 0)  | 0.00( 0)  | 0.00( 0)  | 0.00( 0) | 0.00( 0)  | 0.00( 0)  | 0.00( 0)  |
| C(2) | 0.04( 2)  | 0.00( 0) | -0.03( 0) | 0.00( 2)  | -0.02( 2) | 0.02( 0) | 0.01( 0)  | 0.06( 2)  | -0.01( 2) |
| C(5) | 0.04( 0)  | 0.00( 0) | -0.03( 0) | 0.00( 0)  | -0.02( 0) | 0.02( 0) | 0.01( 0)  | 0.06( 0)  | -0.01( 0) |
| C(3) | -0.04( 2) | 0.00( 0) | 0.01( 0)  | -0.01( 2) | 0.14( 2)  | 0.00( 0) | 0.05( 0)  | 0.08( 2)  | 0.03( 2)  |
| C(4) | -0.04( 0) | 0.00( 0) | 0.01( 0)  | -0.01( 0) | 0.14( 0)  | 0.00( 0) | 0.05( 0)  | 0.08( 0)  | 0.03( 0)  |
| C(1) | -0.03( 3) | 0.00( 0) | 0.00( 0)  | -0.05( 3) | 0.00( 2)  | 0.00( 0) | 0.00( 0)  | -0.03( 3) | 0.00( 3)  |
| C(6) | -0.03( 0) | 0.00( 0) | 0.00( 0)  | -0.05( 0) | 0.00( 0)  | 0.00( 0) | 0.00( 0)  | -0.03( 0) | 0.00( 0)  |
